# Supplementary material for: Stimulation of Potent Humoral and Cellular Immunity via Synthetic Dual-Antigen MVA-Based COVID-19 Vaccine COH04S1 in Cancer Patients Post Hematopoietic Cell Transplantation and Cellular Therapy
Source: MDPI journal article supplement (doi:10.3390/vaccines11091492), 2023-09-15
Supplement: s1 [file s1]

## Supplementary Material

### Supplementary Tables

Table S1. Patient characteristics and treatments

| Patient (COH-) | Age <sup>1</sup> | Sex | Type of therapy | Diagnosis          | Days from therapy to COH04S1 | COVID-19 SOC vaccine |                  |                             | SARS-CoV-2 infection |                             |         |
|----------------|------------------|-----|-----------------|--------------------|------------------------------|----------------------|------------------|-----------------------------|----------------------|-----------------------------|---------|
|                |                  |     |                 |                    |                              | Donor                | Pre-therapy      | Post-COH04S1 (day of study) | Pre-therapy          | Post-COH04S1 (day of study) | Therapy |
| 201            | 38               | M   | Allo-HCT        | AML                | 118                          | 2 doses              | none             | Pfizer (150)                | none                 | none                        |         |
| 202            | 55               | M   | Allo-HCT        | Myelofibrosis      | 171                          | N/A                  | 2 doses, Pfizer  | none                        | none                 | X (53)                      | R       |
| 203            | 67               | F   | Auto-HCT        | MM                 | 148                          | /                    | 2 doses, Moderna | Moderna (69)                | none                 | none                        |         |
| 204            | 52               | F   | Auto-HCT        | MM                 | 130                          | /                    | 2 doses, Pfizer  | none                        | none                 | X (94)                      | P       |
| 205            | 65               | F   | Allo-HCT        | CMML               | 149                          | N/A                  | 2 doses, Pfizer  | none                        | none                 | none                        |         |
| 206            | 73               | M   | CAR-T cells     | Lymphoma           | 247                          | /                    | 2 doses, Moderna | Moderna (139)               | none                 | none                        |         |
| 207            | 69               | M   | Auto-HCT        | MM                 | 103                          | /                    | 2 doses, Pfizer  | none                        | none                 | none                        |         |
| 208            | 61               | F   | Allo-HCT        | AML                | 179                          | N/A                  | 2 doses, Pfizer  | none                        | none                 | none                        |         |
| 209            | 45               | M   | Allo-HCT        | AML                | 235                          | none                 | none             | none                        | none                 | X (145)                     | R       |
| 210            | 49               | F   | Allo-HCT        | AML                | 198                          | N/A                  | 2 doses, Moderna | none                        | none                 | none                        |         |
| 211            | 41               | F   | Auto-HCT        | Hodgkin's lymphoma | 106                          | /                    | 2 doses, Pfizer  | none                        | none                 | none                        |         |
| 213            | 47               | F   | Auto-HCT        | Amyloidosis        | 238                          | /                    | 2 doses, Pfizer  | none                        | none                 | X (116)                     | none    |
| 215            | 47               | F   | Auto-HCT        | MM                 | 124                          | /                    | 2 doses, Moderna | none                        | none                 | none                        |         |

<sup>1</sup>= years, SOC= standard of care, M= male, F= female, Allo= allogeneic, Auto= autologous, HCT= hematopoietic cell transplant, AML= Acute myeloid leukemia, MM= Multiple myeloma, CMML= Chronic myelomonocytic leukemia, N/A= not available, /= not applies, Pfizer= Comirnaty®, Moderna= Spikevax®, R= Remdesivir®, P= Paxlovid®.

| Supplementary Table S1 (continued) |      |                              |                  |          |                 |                           |                           |                         |           |
|------------------------------------|------|------------------------------|------------------|----------|-----------------|---------------------------|---------------------------|-------------------------|-----------|
| Patient (COH-)                     | IVIG | Evusheld (days before study) | GVHD (gr 3 to 4) | Steroids | Anti-neoplastic | mAb                       | TK/ Proteasome inhibitors | Immuno-modulatory drugs | Others    |
| 201                                |      |                              | none             |          |                 |                           |                           |                         |           |
| 202                                |      |                              | none             |          |                 |                           |                           |                         |           |
| 203                                |      |                              | N/A              |          |                 |                           |                           |                         |           |
| 204                                | X    |                              | N/A              | Lo       | Bortezomib      | Daratumumab , Teclistamab |                           |                         | Radiation |
| 205                                |      |                              | none             |          |                 |                           | Itacitinib                | Tacrolimus, Sirolimus   |           |
| 206                                | X    |                              | N/A              |          |                 |                           |                           |                         |           |
| 207                                |      |                              | N/A              | Lo       |                 | Denosumab                 | Kyprolis                  | Revlimid                |           |
| 208                                | X    |                              | cGVHD            | Hi       |                 |                           | Itacitinib, Ruxolitinib   | Tacrolimus, Sirolimus   |           |
| 209                                |      |                              | None             |          |                 |                           | Midostaurin               |                         |           |
| 210                                |      |                              | cGVHD            | Lo       |                 |                           | Ruxolitinib               | Tacrolimus, Sirolimus   |           |
| 211                                |      | -108, -54                    | N/A              |          |                 |                           |                           |                         |           |
| 213                                |      | -187                         | N/A              |          |                 |                           |                           |                         |           |
| 215                                |      | -125                         | N/A              |          |                 |                           |                           | Revlimid                |           |

IVIG= Intravenous immune globulin, GVHD= Graft versus host disease, gr= grade, c= chronic, N/A= not available, Hi= high dose (>0.5 mg/Kg/day), Lo= low dose (<0.5 mg/Kg/day), mAb= monoclonal antibody.

Table S2. Humoral response geometric mean and geometric mean fold increase by study day

| Parameter           | Day | N  | Geometric Mean (GM) |        |         |          | Geometric Mean Fold Rise (GMFR) |     |        |          |
|---------------------|-----|----|---------------------|--------|---------|----------|---------------------------------|-----|--------|----------|
|                     |     |    | Est GM              | LL     | UL      | p-value  | Est GMFR                        | LL  | UL     | p-values |
| ELISA S             | 0   | 13 | 90.2                | 17.7   | 458.8   | 0.0001   | NA                              | NA  | NA     | NA       |
|                     | 28  | 13 | 1242.6              | 263.0  | 5870.9  | <0.0001  | 13.8                            | 3.6 | 52.9   | 0.0011   |
|                     | 56  | 12 | 3272.5              | 1114.1 | 9612.6  | <0.0001  | 35.2                            | 7.5 | 166.4  | 0.0004   |
|                     | 84  | 5  | 12046.6             | 4461.9 | 32524.4 | <0.0001  | 39.0                            | 1.9 | 778.8  | 0.0274   |
|                     | 120 | 5  | 851.1               | 38.3   | 18919.7 | 0.0038   | 21.3                            | 0.6 | 727.4  | 0.0739   |
|                     | 140 | 4  | 3887.5              | 1649.4 | 9162.5  | 0.0001   | 7.6                             | 0.4 | 145.3  | 0.1167   |
|                     | 180 | 6  | 11727.5             | 4520.2 | 30426.5 | <0.0001  | 21.6                            | 1.4 | 339.8  | 0.0353   |
| ELISA RBD           | 0   | 13 | 45.8                | 9.9    | 212.1   | 0.0002   | NA                              | NA  | NA     | NA       |
|                     | 28  | 13 | 516.4               | 96.8   | 2753.8  | <0.0001  | 11.3                            | 1.8 | 68.9   | 0.013    |
|                     | 56  | 12 | 1267.6              | 475.3  | 3380.7  | <0.0001  | 26.5                            | 4.9 | 142.1  | 0.0013   |
|                     | 84  | 5  | 4384.5              | 1038.4 | 18512.7 | 0.0001   | 53.4                            | 0.4 | 6571.3 | 0.0834   |
|                     | 120 | 5  | 443.4               | 28.6   | 6862.6  | 0.0035   | 13.4                            | 0.7 | 272.3  | 0.0753   |
|                     | 140 | 4  | 1639.3              | 349.8  | 7683.6  | 0.0006   | 13.1                            | 0.1 | 3248.9 | 0.2341   |
|                     | 180 | 6  | 5510.9              | 1505.7 | 20169.2 | <0.0001  | 38.4                            | 0.6 | 2309.1 | 0.0707   |
| ELISA N             | 0   | 13 | 2.3                 | 1.2    | 4.3     | 0.0151   | NA                              | NA  | NA     | NA       |
|                     | 28  | 13 | 5.7                 | 1.7    | 19.1    | 0.0087   | 2.5                             | 0.7 | 9.3    | 0.1586   |
|                     | 56  | 12 | 20.6                | 5.5    | 77.5    | 0.0004   | 8.8                             | 1.6 | 47.1   | 0.0159   |
|                     | 84  | 5  | 211.2               | 37.9   | 1178.5  | 0.001    | 73.1                            | 3.1 | 1704.3 | 0.0194   |
|                     | 120 | 5  | 7.3                 | 0.6    | 96.0    | 0.0993   | 2.9                             | 0.1 | 71.0   | 0.4159   |
|                     | 140 | 4  | 57.3                | 5.7    | 575.3   | 0.0113   | 23.8                            | 0.6 | 1012.2 | 0.0744   |
|                     | 180 | 6  | 112.1               | 10.7   | 1168.8  | 0.0035   | 60.4                            | 3.4 | 1080.7 | 0.0147   |
| NAb Wuhan           | 0   | 13 | 94.2                | 20.5   | 434     | <0.0001  | NA                              | NA  | NA     | NA       |
|                     | 28  | 13 | 1119.9              | 236.9  | 5293.8  | <0.0001  | 11.9                            | 2.2 | 65     | 0.008    |
|                     | 56  | 12 | 2466.7              | 824.8  | 7377    | <0.0001  | 26.1                            | 4.2 | 161.9  | 0.0023   |
|                     | 84  | 5  | 3254.1              | 619.8  | 17083   | 0.0002   | 13.2                            | 0.1 | 1411.3 | 0.1999   |
|                     | 120 | 5  | 605.0               | 20.5   | 17882   | 0.0063   | 8.9                             | 0.1 | 635.7  | 0.229    |
|                     | 140 | 4  | 1977.5              | 451.6  | 8658.7  | 0.0005   | 4.9                             | 0.1 | 286.3  | 0.3029   |
|                     | 180 | 6  | 3682.0              | 1807.9 | 7498.8  | <0.001   | 11.5                            | 0.3 | 437.0  | 0.1454   |
| NAb Beta            | 0   | 13 | 69.3                | 17.9   | 268.3   | <0.0001  | NA                              | NA  | NA     | NA       |
|                     | 28  | 13 | 812.1               | 177.1  | 3723.1  | <0.0001  | 11.7                            | 2.9 | 47     | 0.0023   |
|                     | 56  | 12 | 1764.8              | 422.3  | 7376.2  | <0.0001  | 21.7                            | 4.5 | 105.2  | 0.0013   |
|                     | 84  | 5  | 4368.2              | 689.6  | 27669   | 0.0002   | 24.0                            | 0.4 | 1435.4 | 0.0973   |
|                     | 120 | 5  | 280.1               | 8.6    | 9097.1  | 0.0109   | 5.1                             | 0.2 | 132.3  | 0.2356   |
|                     | 140 | 4  | 3659.6              | 1048.5 | 12773.5 | 0.0002   | 14.2                            | 0.3 | 756.8  | 0.1232   |
|                     | 180 | 6  | 3086.6              | 1816   | 5246    | <0.0001  | 11.8                            | 0.4 | 310.3  | 0.1097   |
| NAb Delta           | 0   | 13 | 92.4                | 21.8   | 391     | <0.0001  | NA                              | NA  | NA     | NA       |
|                     | 28  | 13 | 928.8               | 179.7  | 4798.9  | <0.0001  | 10.1                            | 2.1 | 48.9   | 0.0079   |
|                     | 56  | 12 | 2249.4              | 634.9  | 7968.7  | <0.0001  | 23.0                            | 4.3 | 123.9  | 0.0018   |
|                     | 84  | 5  | 2409.8              | 387.1  | 15000.9 | 0.0003   | 11.6                            | 0.2 | 703.1  | 0.1728   |
|                     | 120 | 5  | 271.8               | 11.0   | 6736.3  | 0.0084   | 3.2                             | 0.1 | 135.4  | 0.4422   |
|                     | 140 | 4  | 1125.2              | 303.7  | 4168.5  | 0.0004   | 3.7                             | 0.1 | 206.9  | 0.3826   |
|                     | 180 | 6  | 1953                | 1067.5 | 3573.3  | <0.0001  | 6.2                             | 0.2 | 157    | 0.2064   |
| NAb Omicron BA.1    | 0   | 13 | 35.9                | 10.9   | 118.5   | <0.0001  | NA                              | NA  | NA     | NA       |
|                     | 28  | 13 | 331.2               | 76.8   | 1428.2  | <0.0001  | 9.2                             | 2.3 | 37.0   | 0.0045   |
|                     | 56  | 12 | 613.6               | 168.4  | 2235.6  | <0.0001  | 15.4                            | 3.6 | 65.3   | 0.0016   |
|                     | 84  | 5  | 2084.7              | 470.5  | 9236.9  | 0.0001   | 27.7                            | 1.0 | 802.4  | 0.0519   |
|                     | 120 | 5  | 131.5               | 3.1    | 5594.9  | 0.0225   | 3.6                             | 0.1 | 107.6  | 0.3594   |
|                     | 140 | 4  | 648.0               | 219.1  | 1916.0  | 0.0003   | 5.2                             | 0.2 | 147.5  | 0.2147   |
|                     | 180 | 6  | 2156.3              | 1000.1 | 4649.3  | <0.0001  | 16.2                            | 0.8 | 349    | 0.0668   |
| NAb Omicron XBB.1.5 | 0   | 13 | 12.9                | 7.4    | 22.2    | <0.0001  | NA                              | NA  | NA     | NA       |
|                     | 28  | 13 | 57.1                | 17.4   | 186.9   | <0.0001  | 4.4                             | 1.7 | 11.9   | 0.0062   |
|                     | 56  | 12 | 104.8               | 30.3   | 362.8   | <0.0001  | 8.0                             | 2.6 | 24.2   | 0.0017   |
|                     | 84  | 5  | 225.9               | 31.9   | 1599.4  | 0.0015   | 22.6                            | 3.2 | 159.9  | 0.0115   |
|                     | 120 | 5  | 37.5                | 3.8    | 367.9   | 0.0116   | 2.0                             | 0.2 | 16.7   | 0.4352   |
|                     | 140 | 4  | 301.2               | 83.7   | 1083.9  | 0.0008   | 30.1                            | 8.4 | 108.4  | 0.0035   |
|                     | 180 | 6  | 256.5               | 80.5   | 817.3   | 1.00E-04 | 14.9                            | 2.5 | 88.3   | 0.0114   |

\*confidence intervals based on log10-transformed data following a Student's t distribution with N -1 degrees of freedom, NA = not applicable.

Table S3. Cellular response geometric mean and geometric mean fold increase by study day

| Parameter      | Day | N  | Geometric Mean (GM) |        |             |         | Geometric Mean Fold Rise (GMFR) |      |             |          |
|----------------|-----|----|---------------------|--------|-------------|---------|---------------------------------|------|-------------|----------|
|                |     |    | 95% CI              |        |             |         | 95% CI                          |      |             |          |
|                |     |    | Est GM              | LL     | UL          | p-value | Est GMFR                        | LL   | UL          | p-values |
| IFN $\gamma$ S | 0   | 13 | 124.1               | 43     | 357.7       | <0.0001 | NA                              | NA   | NA          | NA       |
|                | 28  | 13 | 1576.7              | 386.3  | 6436.2      | <0.0001 | 12.7                            | 4.4  | 36.6        | 0.0002   |
|                | 56  | 12 | 3691                | 1630.7 | 8354.3      | <0.0001 | 25.9                            | 9.4  | 71.4        | <0.0001  |
|                | 84  | 5  | 2651.1              | 978.5  | 7182.9      | <0.0001 | 19.5                            | 2.3  | 163.5       | 0.0177   |
|                | 120 | 5  | 1717.4              | 385.2  | 7657        | 0.0002  | 15.0                            | 2.0  | 113.4       | 0.0205   |
|                | 140 | 4  | 3561.2              | 1726.8 | 7344.5      | <0.0001 | 20.5                            | 0.7  | 581         | 0.064    |
|                | 180 | 6  | 4754.7              | 1735.2 | 13029       | <0.0001 | 28.9                            | 2.7  | 311         | 0.0149   |
| IFN $\gamma$ N | 0   | 13 | 14.5                | 4.6    | 45.8        | 0.0003  | NA                              | NA   | NA          | NA       |
|                | 28  | 13 | 209.6               | 60.0   | 732         | <0.0001 | 14.5                            | 5.3  | 39.8        | 0.0001   |
|                | 56  | 12 | 435.5               | 127.2  | 1491.3      | <0.0001 | 28.3                            | 9.6  | 83.1        | <0.0001  |
|                | 84  | 5  | 147.9               | 6.1    | 3612.9      | 0.0122  | 9.0                             | 0.8  | 96.7        | 0.0618   |
|                | 120 | 5  | 198.8               | 23.9   | 1654        | 0.0023  | 12.8                            | 0.1  | 1132        | 0.1887   |
|                | 140 | 4  | 380.6               | 46.6   | 3110.3      | 0.0029  | 15.2                            | 0.9  | 261.9       | 0.056    |
|                | 180 | 6  | 753.5               | 232.5  | 2441.2      | <0.0001 | 31.5                            | 4.4  | 225         | 0.0063   |
| IFN $\gamma$ M | 0   | 13 | 9.9                 | 3.0    | 32.8        | 0.0014  | NA                              | NA   | NA          | NA       |
|                | 28  | 13 | 9.2                 | 2.4    | 34.3        | 0.0033  | 0.9                             | 0.3  | 2.5         | 0.8756   |
|                | 56  | 12 | 7.5                 | 1.7    | 32.8        | 0.012   | 0.6                             | 0.2  | 2.0         | 0.3867   |
|                | 84  | 5  | 12.5                | 2.0    | 76.6        | 0.018   | 0.9                             | 0.2  | 5.2         | 0.8644   |
|                | 120 | 5  | 3.6                 | 0.6    | 20.2        | 0.1124  | 0.5                             | 0    | 18.3        | 0.6178   |
|                | 140 | 4  | 21.6                | 0.9    | 538.3       | 0.0559  | 2.6                             | 0.4  | 16.2        | 0.1974   |
|                | 180 | 6  | 4.2                 | 0.4    | 40.3        | 0.166   | 0.5                             | 0.1  | 3.3         | 0.3872   |
| AIM S CD4      | 0   | 9  | 0.3                 | 0.1    | 1.1         | 0.0689  | NA                              | NA   | NA          | NA       |
|                | 28  | 8  | 3.8                 | 1.5    | 9.5         | 0.0107  | 19.2                            | 8.8  | 41.7        | <0.0001  |
|                | 56  | 8  | 6.4                 | 3.5    | 11.5        | 0.0001  | 14.6                            | 5.2  | 40.5        | 0.0005   |
|                | 84  | 2  | 8.0                 | 0.5    | 130.1       | 0.0671  | 7.2                             | 0    | Inf         | 0.5258   |
|                | 120 | 5  | 5.5                 | 2.9    | 10.3        | 0.0017  | 21.7                            | 12.6 | 37.2        | 0.0001   |
|                | 140 | 1  | 8.1                 | 12.6   | 37.2        | 0.0001  | 1.1                             | NE   | NE          | NE       |
|                | 180 | 3  | 5.2                 | 0.3    | 86.8        | 0.1287  | 5.6                             | 0.2  | 167.5       | 0.1619   |
| AIM N CD4      | 0   | 9  | 0.0                 | 0.0    | 0.3         | 0.0067  | NA                              | NA   | NA          | NA       |
|                | 28  | 8  | 1.7                 | 0.4    | 7.1         | 0.4145  | 72.1                            | 4.4  | 1190.6      | 0.0087   |
|                | 56  | 8  | 3.0                 | 1.0    | 8.5         | 0.0448  | 55.5                            | 6.2  | 496.8       | 0.0034   |
|                | 84  | 2  | 1.8                 | 0.0    | 121.4       | 0.3163  | 69                              | 0.0  | Inf         | 0.3875   |
|                | 120 | 5  | 2.0                 | 0.6    | 6.3         | 0.1749  | 43.8                            | 2.0  | 979.1       | 0.0278   |
|                | 140 | 1  | 1.7                 | 2.0    | 979.1       | 0.0278  | 2.5                             | NE   | NE          | NE       |
|                | 180 | 3  | 1.2                 | 0.0    | 50.6        | 0.8257  | 27.0                            | 0.2  | 3200.6      | 0.0971   |
| AIM S CD8      | 0   | 9  | 0.0                 | 0.0    | 0.2         | 0.0036  | NA                              | NA   | NA          | NA       |
|                | 28  | 8  | 0.1                 | 0.0    | 1.1         | 0.0591  | 4.3                             | 0.8  | 23.2        | 0.0786   |
|                | 56  | 8  | 0.7                 | 0.2    | 1.9         | 0.3801  | 12.0                            | 3.8  | 38.4        | 0.0015   |
|                | 84  | 2  | 1.6                 | 0.0    | 146538047.9 | 0.8087  | 11.2                            | 0.0  | 160733487.4 | 0.3136   |
|                | 120 | 5  | 0.3                 | 0.1    | 1.4         | 0.1054  | 9.0                             | 1.0  | 79.3        | 0.0479   |
|                | 140 | 1  | 4.8                 | 1.0    | 79.3        | 0.0479  | 2.2                             | NE   | NE          | NE       |
|                | 180 | 3  | 0.7                 | 0.0    | 65          | 0.7433  | 1.9                             | 0.8  | 4.4         | 0.0904   |
| AIM N CD8      | 0   | 9  | 0.0                 | 0.0    | 0.0         | 0.0001  | NA                              | NA   | NA          | NA       |
|                | 28  | 8  | 0.0                 | 0.0    | 0.2         | 0.0057  | 4.3                             | 0.2  | 83.8        | 0.2786   |
|                | 56  | 8  | 0.1                 | 0.0    | 0.3         | 0.0012  | 13.0                            | 4.3  | 38.9        | 0.0009   |
|                | 84  | 2  | 0.0                 | 0.0    | 18000730.1  | 0.2611  | 6.4                             | 0.3  | 156.8       | 0.0855   |
|                | 120 | 5  | 0.1                 | 0.0    | 0.4         | 0.0113  | 6.8                             | 0.2  | 270         | 0.2218   |
|                | 140 | 1  | 0.1                 | 0.2    | 270.0       | 0.2218  | 5.0                             | NE   | NE          | NE       |
|                | 180 | 3  | 0.0                 | 0.0    | 1.9         | 0.069   | 1.0                             | 0.0  | 72.4        | 0.989    |

\*confidence intervals based on log10-transformed data following a Student's t distribution with N -1 degrees of freedom, NA = not applicable, NE = not estimable

Table S4. Comparison of COH04S1 HCT/CAR-T patient population with healthy adults vaccinated with COH04S1 and Comirnaty®.

|                                 | COH04S1,<br>HCT/CAR-T | COH04S1,<br>HV | Comirnaty,<br>HCW | COH04S1<br>HCT/CAR-T<br>vs.<br>COH04S1<br>HV (p*) | COH04S1<br>HCT/CAR-T<br>vs.<br>Comirnaty<br>HCW (p*) | COH04S1<br>HV<br>vs.<br>Comirnaty<br>HCW (p*) |
|---------------------------------|-----------------------|----------------|-------------------|---------------------------------------------------|------------------------------------------------------|-----------------------------------------------|
| <b>Number of individuals, n</b> | 13                    | 9              | 16                | /                                                 | /                                                    | /                                             |
| <b>Age, mean (range)</b>        | 55 (38-73)            | 32 (25-41)     | 49 (24-74)        | <0.0001                                           | NS                                                   | 0.0013                                        |
| <b>Female, n (%)</b>            | 8 (62)                | 5 (56)         | 11 (69)           | /                                                 | /                                                    | /                                             |
| <b>Allogeneic HCT, n (%)</b>    | 6 (46)                | /              | /                 | /                                                 | /                                                    | /                                             |
| <b>Autologous HCT, n (%)</b>    | 6 (46)                | /              | /                 | /                                                 | /                                                    | /                                             |
| <b>CAR-T, n (%)</b>             | 1 (8)                 | /              | /                 | /                                                 | /                                                    | /                                             |

\*Calculated using two-tailed Mann-Whitney test, NS= p>0.05.

HCT=hematopoietic cell transplant, CAR-T=chimeric antigen receptor T cell, HV=healthy volunteers, HCW=healthcare workers, NS= not significant.

Table S5. Flow Cytometry Reagents

| Reagent                             | Source (Brand) | Identifier (Catalog#) |
|-------------------------------------|----------------|-----------------------|
| Viability Dye L/D Near IR           | Invitrogen     | L34975                |
| Anti-human CD3 FITC                 | Biolegend      | 300440                |
| Anti-human CD4 Brilliant Violet 421 | BD             | 566703                |
| Anti-human CD8 Brilliant Violet 605 | BD             | 301040                |
| Anti-human CD137 APC                | Biolegend      | 309810                |
| Anti-human OX40 PE-Cy7              | Biolegend      | 350012                |
| Anti-human CD69 PE                  | BD             | 555531                |
| Anti-human CD14 V500                | Biolegend      | 561391                |
| Anti-human CD19 V500                | Biolegend      | 561121                |
| Anti-human CD45RA PerCP             | Biolegend      | 304156                |
| Anti-human CCR7 PE/Dazzle 594       | Biolegend      | 353236                |

## Supplementary Figures

Figure S1

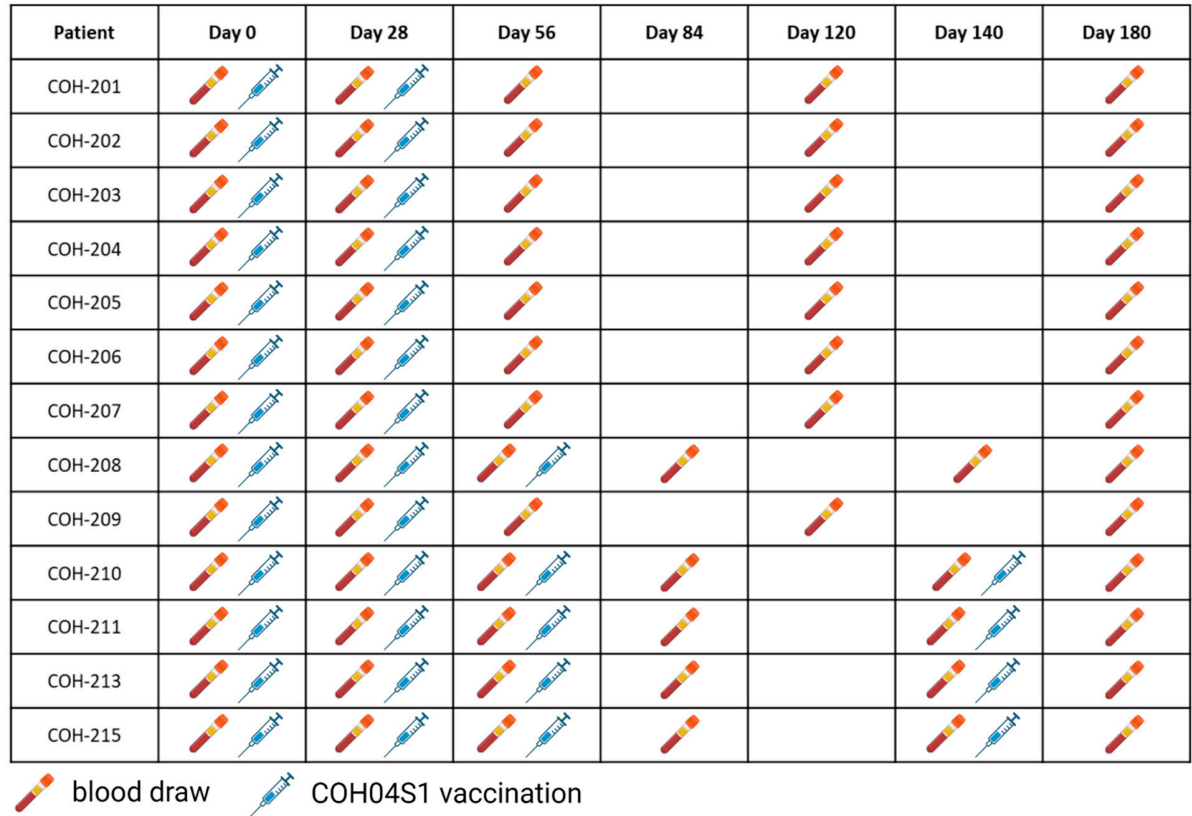

**Patients' vaccination and sampling schedule.** Patients (n=13) were vaccinated two-to-four times with COH04S1 at the indicated timepoints (syringes). Blood samples were collected at the indicated timepoint for immunological analyses (blood tubes). Created with BioRender.com.

Figure S2

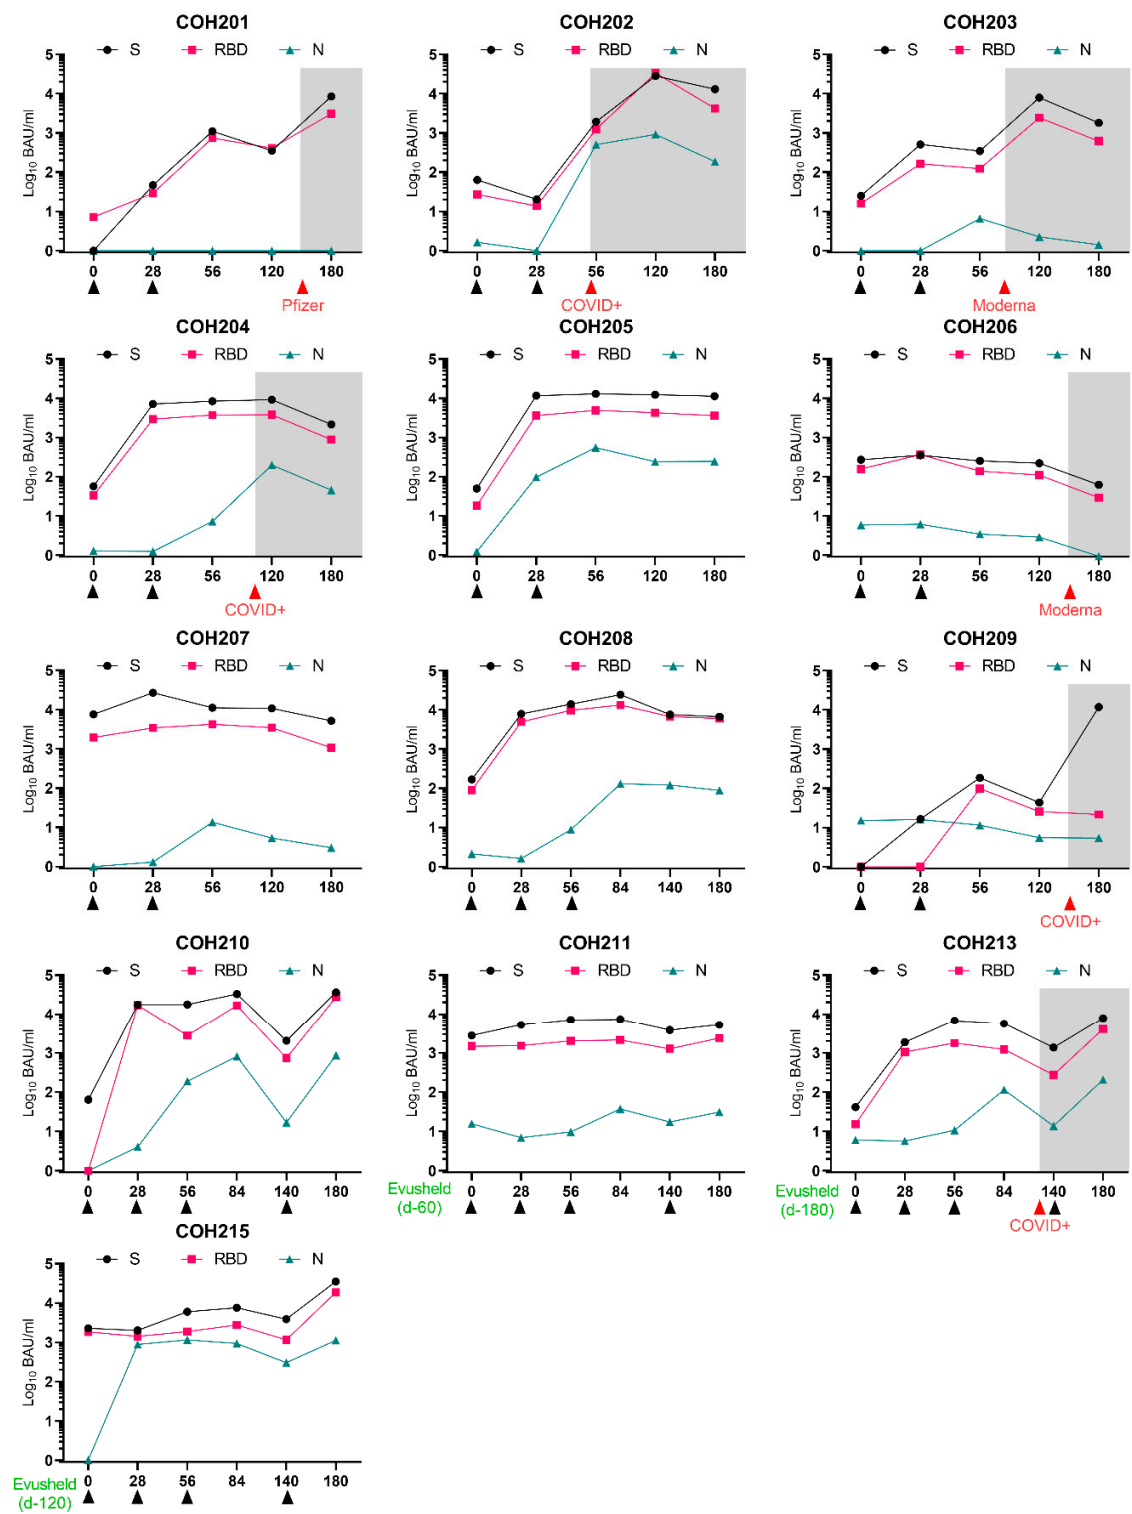



**COH04S1 vaccine-elicited binding IgG in cancer patients post hematopoietic cell transplantation and cellular therapy.** Patients (n=13) were vaccinated two-to-four times with COH04S1 (Figure S1), and serum samples were evaluated for SARS-CoV-2-specific binding IgG. Binding antibody titers to spike (S), receptor-binding domain (RBD), and nucleocapsid (N) antigens were measured by quantitative ELISA in serum samples at the indicated timepoints and expressed as binding antibody units (BAU)/ml. Black arrowheads indicate time of vaccination. Red arrowheads indicate COVID-19 positive test or vaccination with an FDA-approved mRNA vaccine from Moderna or Pfizer. Patients who received Evusheld® after transplant, but before COH04S1, are indicated in green, and the time of administration pre-COH04S1 vaccination is specified. Grey shadowing in the panels marks the samples that were excluded from the immunological analysis due to a disqualifying event (COVID-19+ test, or vaccination with COVID-19 approved vaccines Comirnaty® or Spikevax®).

Figure S3

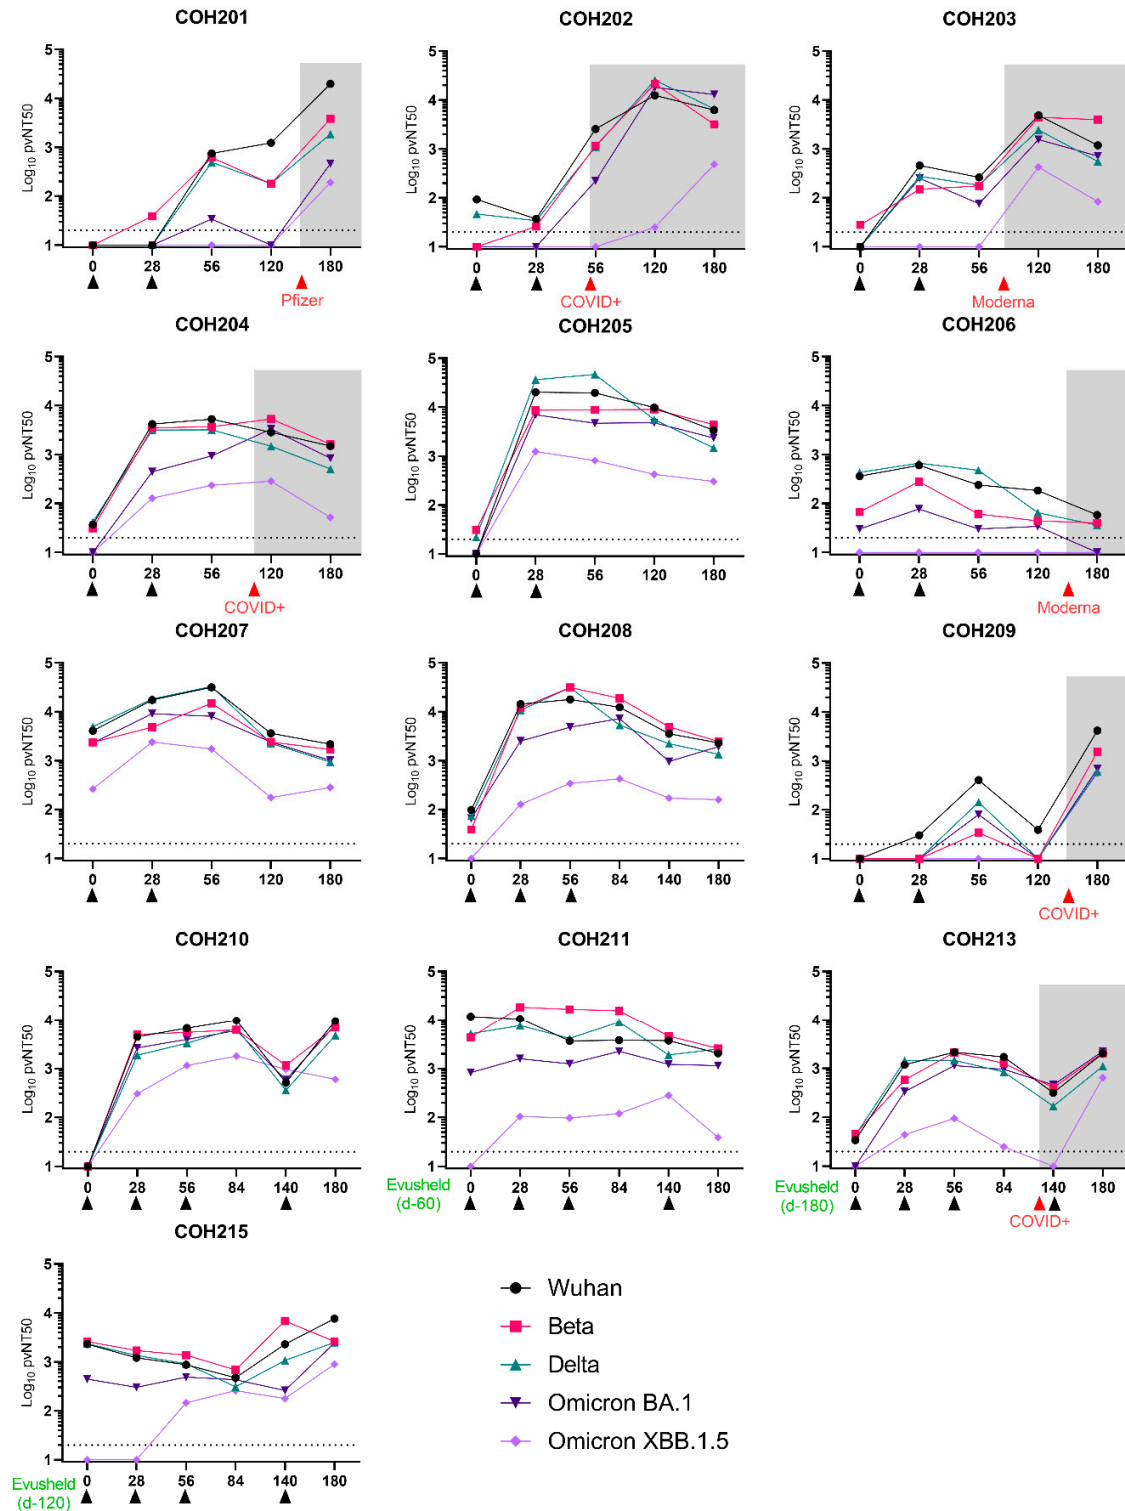

**COH04S1 vaccine-elicited SARS-CoV-2 specific neutralizing antibodies (NAb) in cancer patients post hematopoietic cell transplantation and cellular therapy.** Patients (n=13) were vaccinated two-to-four times with COH04S1 (Figure S1), and serum samples were evaluated for SARS-CoV-2-specific NAb responses against ancestral SARS-CoV-2 (Wuhan-Hu-1), Beta, Delta, and Omicron BA.1 variants at the indicated timepoints. 50% neutralizing antibody titers (NT50) were measured using a pseudovirus (PsV) assay. Dotted lines represent lower limit of detection. Black arrowheads indicate time of vaccination. Red arrowheads indicate COVID-19 positive test or vaccination with an FDA-approved mRNA vaccine from Moderna or Pfizer. Patients who received Evusheld® after transplant, but before COH04S1, are indicated in green, and the time of administration pre-COH04S1 vaccination is specified. Grey shadowing in the panels marks the samples that were excluded from the immunological analysis due to a disqualifying event (COVID-19+ test, or vaccination with COVID-19 approved vaccines Comirnaty® or Spikevax®).

Figure S4

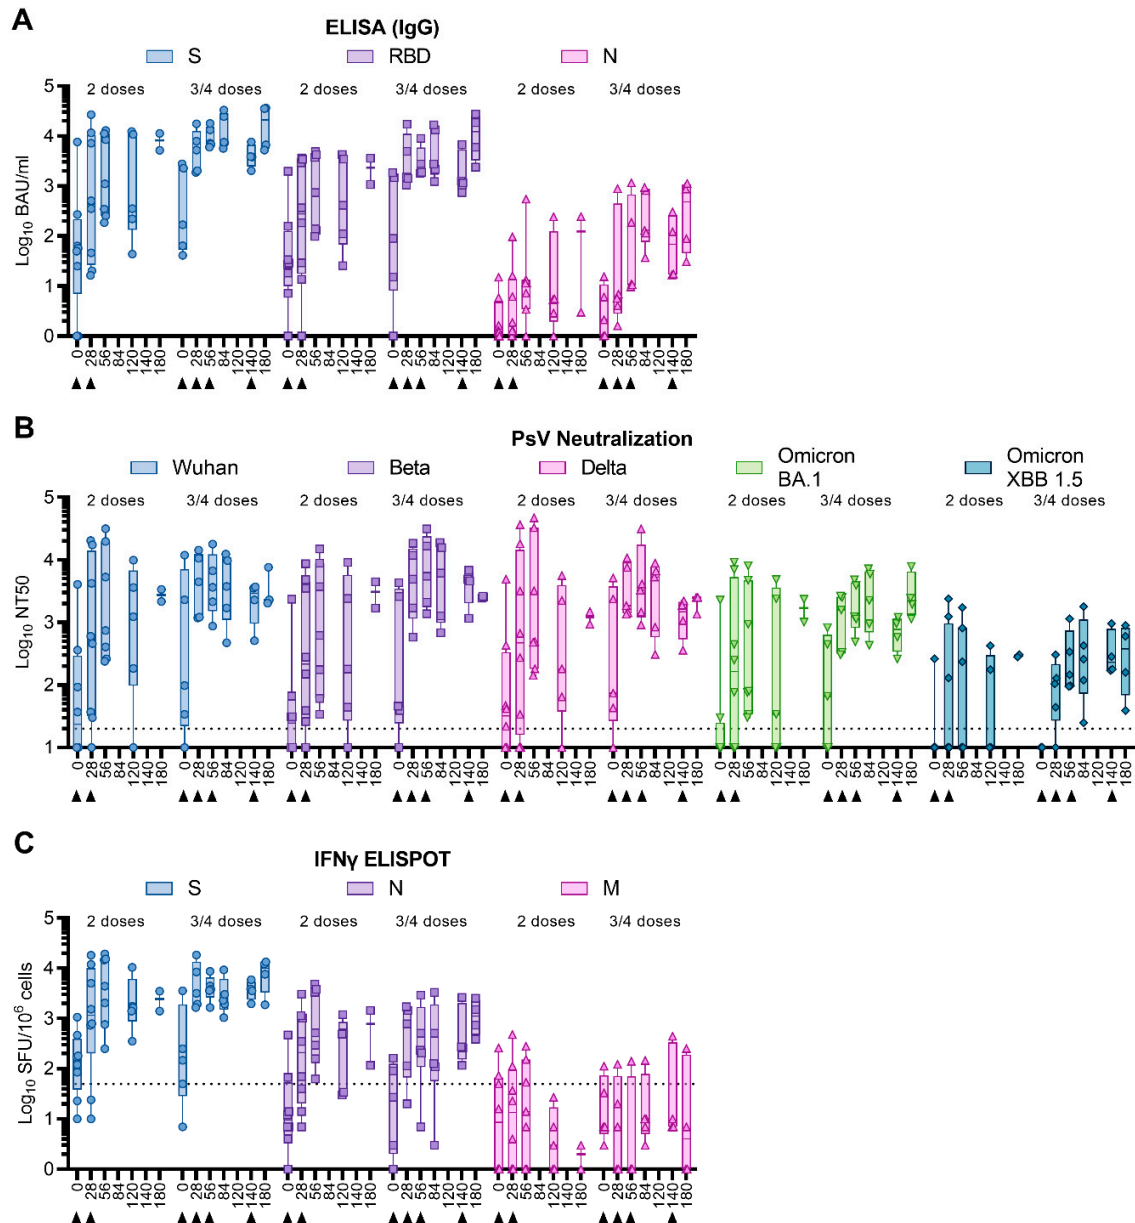

**Comparison of humoral and cellular responses elicited by 2 or 3/4 COH04S1 immunizations.** Cancer patients post hematopoietic cell transplantation and cellular therapy were vaccinated with two (n=8) or three/four doses (n=5) of COH04S1 (Figure S1), and samples were evaluated for SARS-CoV-2-specific humoral and cellular immunity up to six months post-vaccination. A. Binding antibodies. Binding antibody titers to spike (S), receptor-binding domain (RBD), and nucleocapsid (N) antigens were measured by quantitative ELISA in serum samples at the indicated timepoints. B. NAb responses. 50% neutralizing antibody titers (NT50) against ancestral SARS-CoV-2 (Wuhan-Hu-1), Beta, Delta, and Omicron BA.1 and XBB .1.5 variants were measured using a pseudovirus (PsV) assay in serum samples at the indicated timepoints.

Dotted lines represent lower limit of detection. C. IFN $\gamma$  T cells. T cell responses were quantified by IFN $\gamma$  on PBMCs stimulated with S, N, and M peptide libraries at the indicated timepoints. Shown are the IFN $\gamma$  spot forming units (SFU) measured in  $10^6$  PBMCs. Dotted lines represent the arbitrary threshold for a positive response (50 SFU/ $10^6$  PBMCs). Data are presented as box plots extending from 25<sup>th</sup> to 75<sup>th</sup> percentiles, with lines indicating medians, and whiskers going from minimum to maximum values. Black arrowheads indicate time of vaccination.

Figure S5

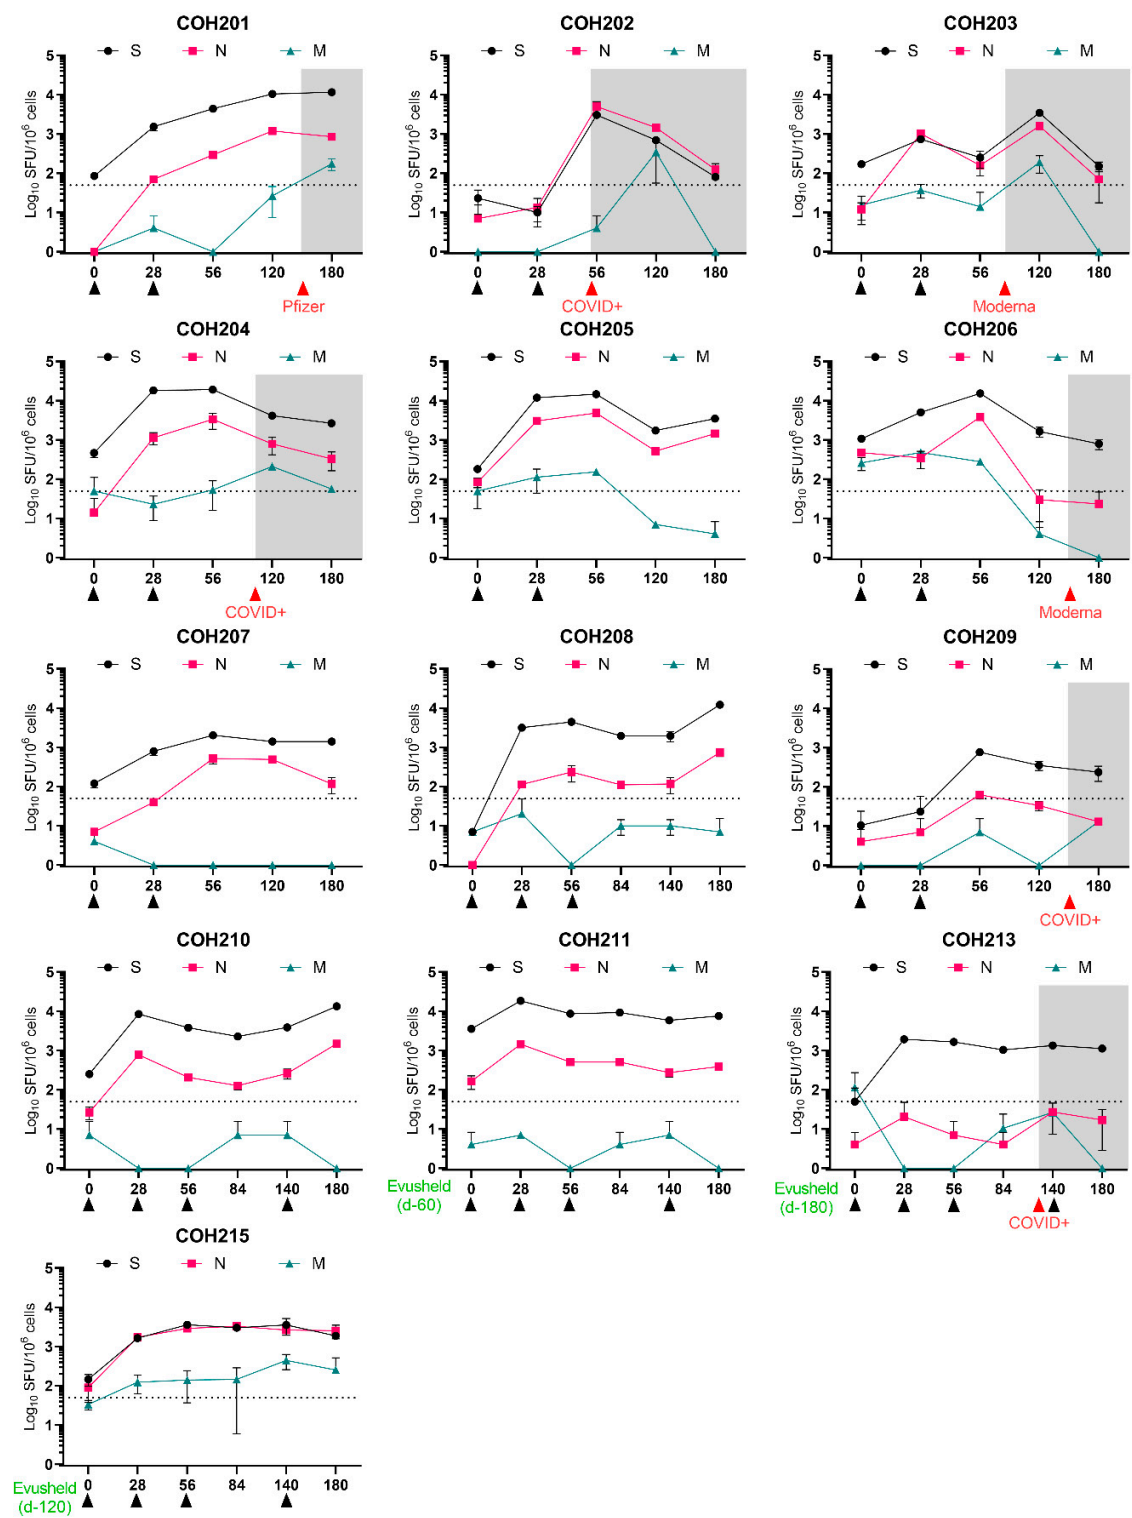

**COH04S1 vaccine-elicited cellular immunity in cancer patients post hematopoietic cell transplantation and cellular therapy.** Patients (n=13) were vaccinated two-to-four times with COH04S1 (Figure S1), and PBMCs samples were evaluated for SARS-CoV-2-specific cellular immunity. T cell responses were quantified by IFN $\gamma$  on PBMCs stimulated with spike (S), nucleocapsid (N), and membrane (M) peptide libraries at the indicated timepoints. Shown are the IFN $\gamma$  spot forming units (SFU) measured in 10<sup>6</sup> PBMCs. Black arrowheads indicate time of vaccination. Red arrowheads indicate COVID-19 positive test or vaccination with an FDA-approved mRNA vaccine from Moderna or Pfizer. Patients who received Evusheld<sup>®</sup> after transplant, but before COH04S1, are indicated in green, and the time of administration pre-COH04S1 vaccination is specified. Grey shadowing in the panels marks the samples that were excluded from the immunological analysis due to a disqualifying event (COVID-19+ test, or vaccination with COVID-19 approved vaccines Comirnaty<sup>®</sup> or Spikevax<sup>®</sup>).

Figure S6

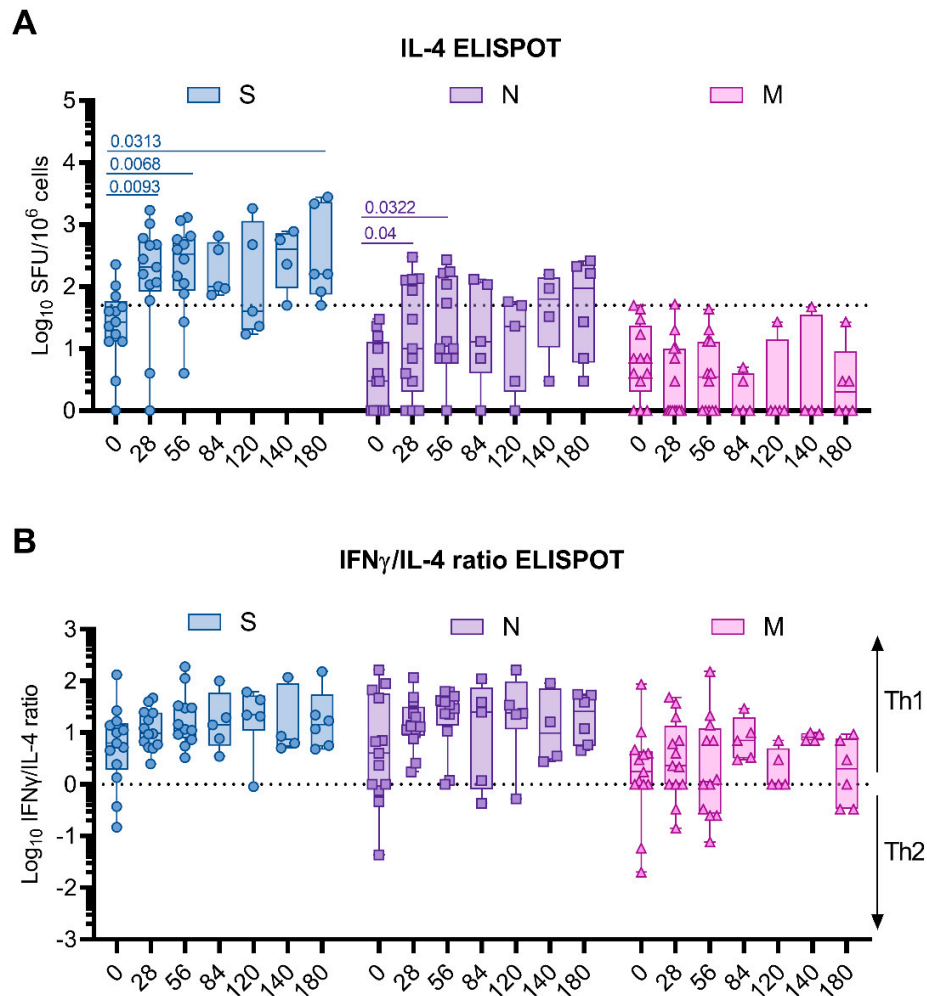

**COH04S1-mediated cellular immunity in cancer patients post hematopoietic cell transplantation and cellular therapy.** Patients (n=13) were vaccinated two-to-four times with COH04S1 (Figure S1), and PBMCs samples were evaluated for SARS-CoV-2-specific cellular immunity. A. IL-4 T cells. IL-4 secreting T cells were quantified by ELISPOT using PBMCs stimulated with S, N, and M peptide libraries at the indicated timepoints. Shown are the IL-4 spot forming units (SFU) measured in  $10^6$  PBMCs. Dotted lines represent the arbitrary threshold for a positive response (50 SFU/ $10^6$  PBMCs). Wilcoxon signed-rank test (two-tailed) was applied to compare baseline to post-vaccine values. P values <0.05 are indicated. Where not indicated  $p>0.05$ . B. Th1/Th2 ratio. Ratios of S-, N-, and M-specific T cells secreting IFN $\gamma$  and IL-4 were evaluated. Dotted line indicates a ratio of 1. A Th1-biased response is >1, a Th2-biased response is <1. Data are presented as box plots extending from 25<sup>th</sup> to 75<sup>th</sup> percentiles, with lines indicating medians, and whiskers going from minimum to maximum values.



Figure S7

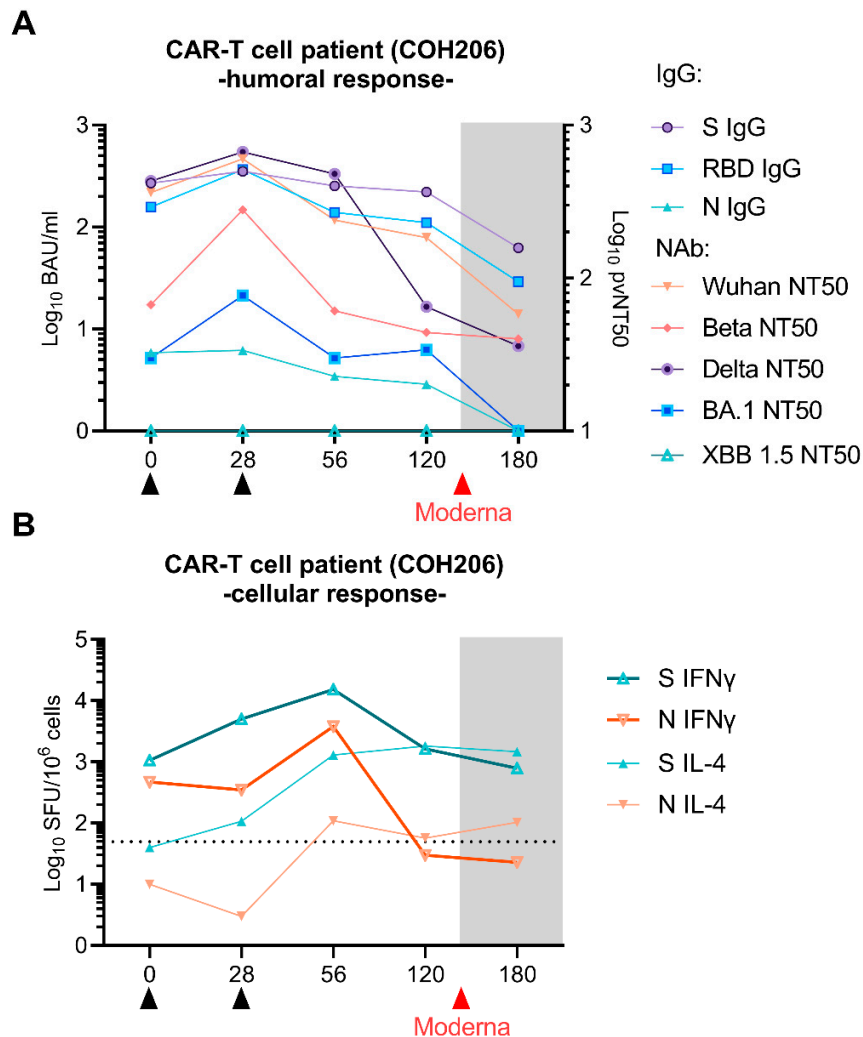

**SARS-CoV-2-specific humoral and cellular immunity in CAR-T cell therapy patient COH206 vaccinated with two doses of COH04S1.** CAR-T cell patient COH206 received two doses of COH04S1 (black arrowheads) about 8 months post treatment (Table S1). Blood samples were evaluated for SARS-CoV-2-specific humoral and cellular immunity up to six months post-vaccination. A. Humoral response. Binding antibody titers to spike (S), receptor-binding domain (RBD), and nucleocapsid (N) antigens were measured by quantitative ELISA in serum samples at the indicated timepoints. 50% neutralizing antibody titers (NT50) against ancestral SARS-CoV-2 (Wuhan-Hu-1), Beta, Delta, and Omicron BA.1 and XBB.1.5 variants were measured using a pseudovirus (PsV) assay in serum samples at the indicated timepoints. B. T cells. T cell responses were quantified by IFNγ/IL-4 ELISPOT on PBMCs stimulated with S and N peptide libraries at the indicated timepoints. Shown are the IFNγ/IL-4 spot forming units (SFU) measured in 10<sup>6</sup> PBMCs. Dotted line represents the arbitrary threshold for a positive response (50 SFU/10<sup>6</sup> PBMCs). Red arrowhead indicates time of vaccination with Spikevax® (mRNA-1273, Moderna). Grey shadowing marks the samples that were excluded from the immunological analysis.

Figure S8

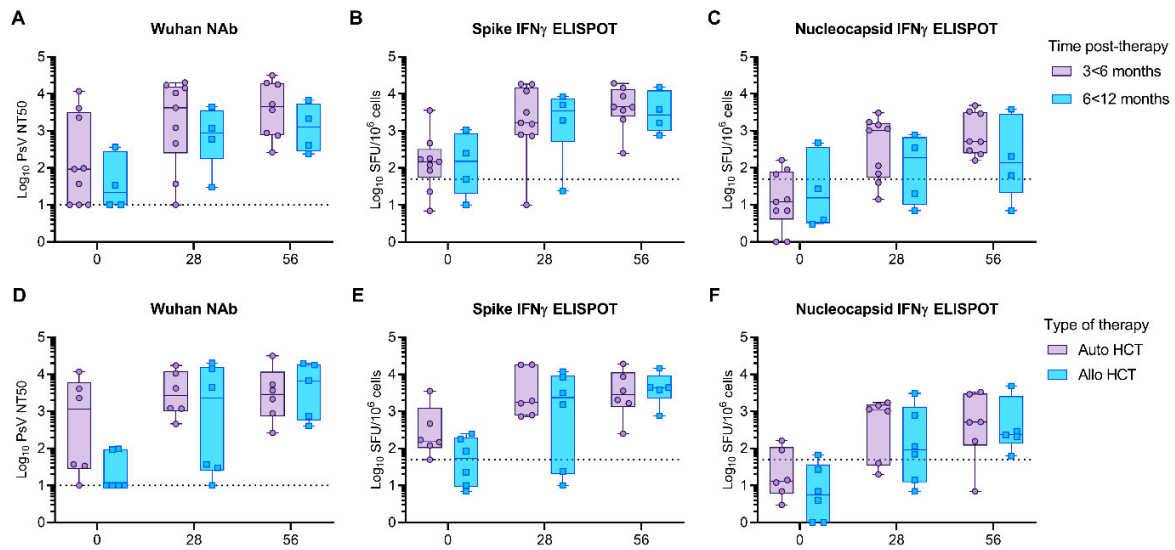

**Differential immunogenicity of two doses of COH04S1 at early- and late-timepoints post-transplant and in auto-HCT and allo-HCT patients.** Patients (n=13) were vaccinated two times with COH04S1, and blood samples were evaluated for SARS-CoV-2-specific humoral and cellular immunity. In A-C COH04S1 immunogenicity was compared between patients who received COH04S1 at 3-6- or 6-12-months post HCT/CAR-T. In D-F COH04S1 immunogenicity was compared between auto- and allo-HCT patients. A, D. NAb responses. 50% neutralizing antibody titers (NT50) against ancestral SARS-CoV-2 (Wuhan-Hu-1) were measured using a pseudovirus (PsV) assay in serum samples at the indicated timepoints. Dotted lines represent lower limit of detection. B-C, E-F. IFN $\gamma$  T cells. S-specific (B, E) and N-specific (C, F) T cell responses were quantified by IFN $\gamma$  on PBMCs stimulated with S and N peptide libraries at the indicated timepoints. Shown are the IFN $\gamma$  spot forming units (SFU) measured in 10<sup>6</sup> PBMCs. Dotted lines represent the arbitrary threshold for a positive response (50 SFU/10<sup>6</sup> PBMCs). Data are presented as box plots extending from 25<sup>th</sup> to 75<sup>th</sup> percentiles, with lines indicating medians, and whiskers going from minimum to maximum values. Two-way ANOVA followed by Tukey's multiple comparison test was applied after log transformation. If not indicated p>0.05.

Figure S9

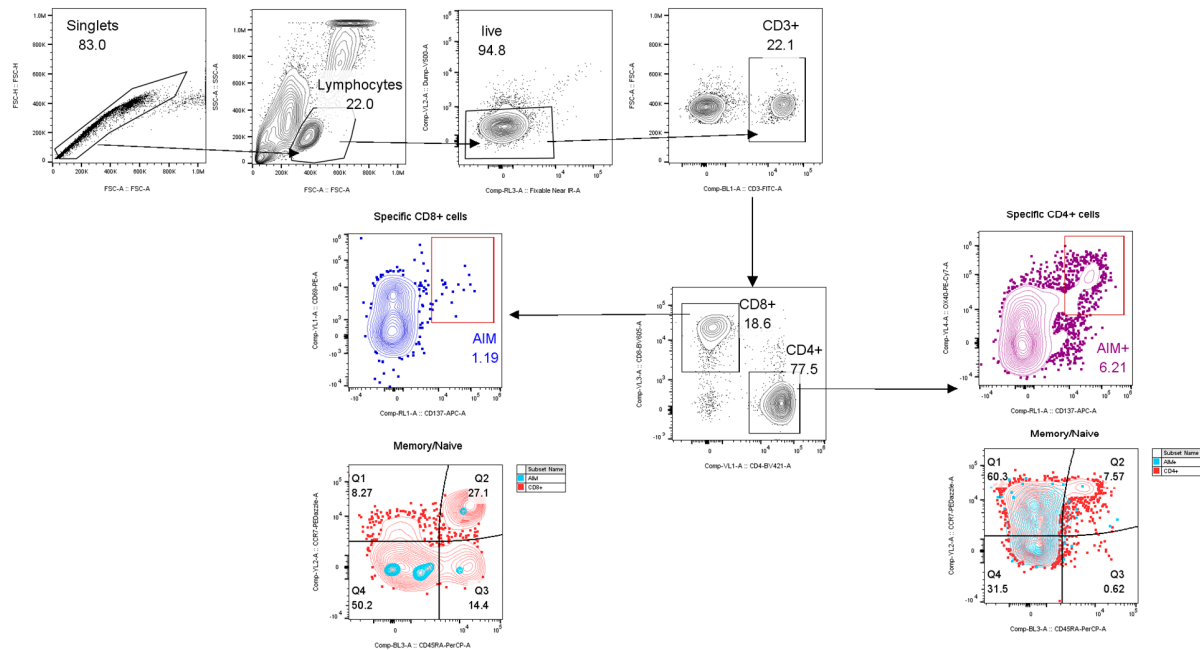

**Gating strategy for the evaluation of S and N-specific T cells.** The analysis was performed using the singlet cells, lymphocyte, and live cells (live and dead Near IR negative) gating. Then, cells were further gated for CD3+ followed by CD4+ and CD8+. From each population, the specific cells were evaluated by the expression of Activation Induced Markers (AIM+) CD137+, OX40+ for CD4+ T cells and CD137+, CD69+, for CD8+ T. Naive Vs Memory subsets were evaluated using CCR7 Vs CD45RA markers from total CD4+ and CD8+ (red) and from AIM+ (blue) cells. Q1=Central Memory (CCR7+, CD45RA-), Q2=Naive (CCR7+, CD45RA+), Q3=Terminally Differentiated Effectors (CCR7-, CD45RA+), Q4=Effector Memory (CCR7-, CD45RA-).

Figure S10

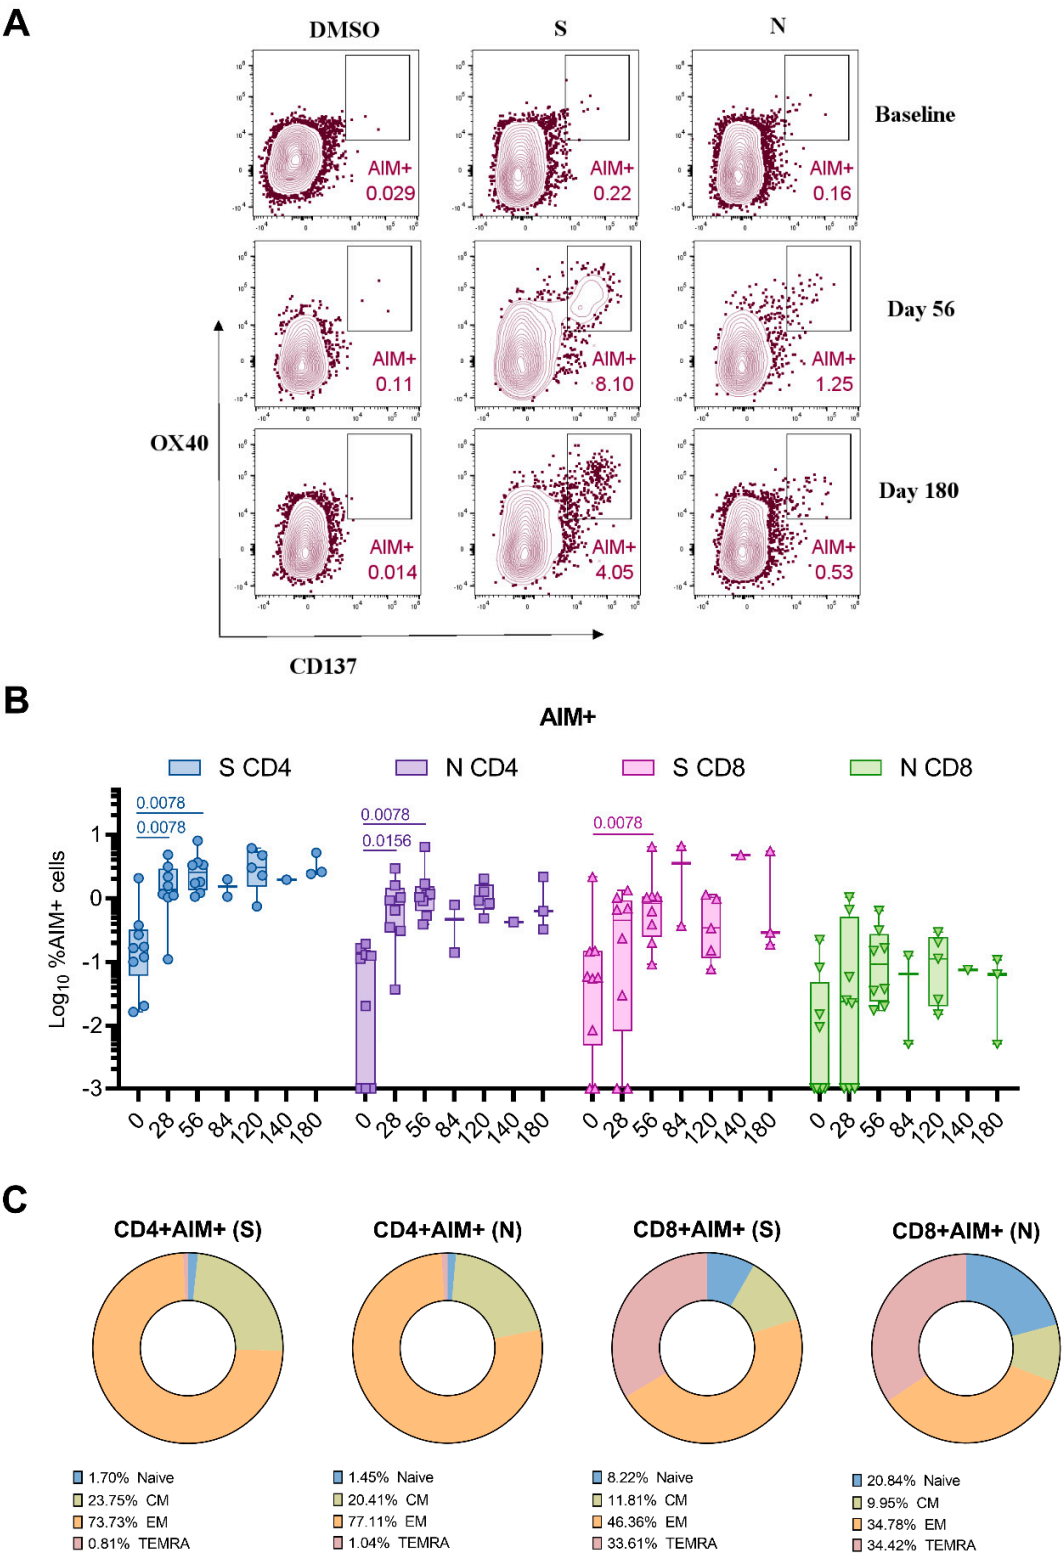

**AIM assay and memory phenotype.** A. Examples of S and N-specific CD4<sup>+</sup> T cells. The specific CD4<sup>+</sup> cells were evaluated by the expression of Activation Induced Markers (AIM<sup>+</sup>) CD137<sup>+</sup>, OX40<sup>+</sup>. Dot plot examples of negative control (DMSO), S-specific, and N-specific are shown for days 0, 56, and 180. B. Activation Induced Markers (AIM<sup>+</sup>) T cell percentage. Percentages of AIM<sup>+</sup> T cells in PBMCs stimulated with S and N peptide libraries were quantified by cytofluorimetry at the indicated timepoints. Data are presented as box plots extending from 25<sup>th</sup> to 75<sup>th</sup> percentiles, with lines indicating medians, and whiskers going from minimum to maximum values. Wilcoxon signed-rank test (two-tailed) was applied to compare baseline to post-vaccine values. P values <0.05 are indicated above the figures. Where not indicated p>0.05. C. T cells memory phenotype. Pie charts show T cells memory phenotypes at one-month post second COH04S1 dose. Naive/Memory subtypes were evaluated in S and N-specific CD4<sup>+</sup> and CD8<sup>+</sup> T cells. Mean percentage of population is shown. In all pie charts n= 9 with the exclusion of CD8<sup>+</sup>AIM<sup>+</sup>(N) where n=3. CM=central memory, EM=effector memory, TEMRA=EM cells re-expressing CD45RA.

Figure S11

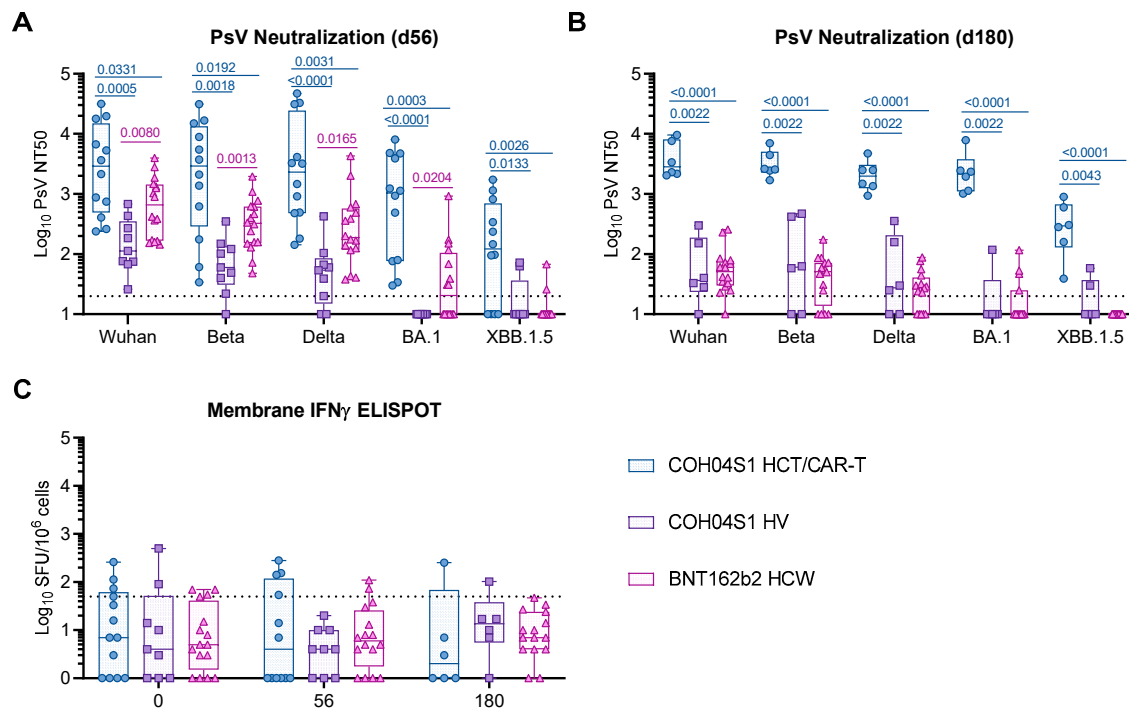

**Immunogenicity of COH04S1 in HCT/CAR-T patients and COH04S1 or Comirnaty® in healthy adults.** (A-B) SARS-CoV-2 neutralizing antibody titers to SARS-CoV-2 Wuhan-Hu-1 ancestral strain and Beta, Delta, and Omicron BA.1 and XBB.1.5 variants were measured in samples of COH04S1-vaccinated HCT/CAR-T patients at days 56 (A, n=12) and 180 (B, n=6) post-vaccination and compared to responses measured in healthy volunteers (HV, n=9 d56, n=6 d180) vaccinated with COH04S1 or healthcare workers (HCW, n=17) vaccinated with FDA-approved mRNA vaccine Comirnaty® at the same timepoint. Dotted lines in A-B represent lower limit of detection. In B 4/6 HCT/CAR-T patients had received three/four COH04S1 doses. (C) IFN $\gamma$  T cells specific for SARS-CoV-2 membrane (M) were measured at baseline, day 56 and 180 post-vaccination in the same subjects as in A-B. Dotted line represents the arbitrary threshold of positivity (50 spots/10<sup>6</sup> cells). Data are presented as box plots extending from 25<sup>th</sup> to 75<sup>th</sup> percentiles, with lines indicating medians, and whiskers going from minimum to maximum values. Values were compared using two-tailed Mann-Whitney test. P values <0.05 are indicated. Where not indicated p>0.05.
